# Supplementary material for: Enzymatic Antioxidant System Activation Assures the Viability of Guadua chacoensis (Bambusoideae, Poaceae) Embryogenic Cultures during Cryopreservation
Source: MDPI journal article supplement (doi:10.3390/plants12030673), 2023-02-03
Supplement: s1 [file s1]

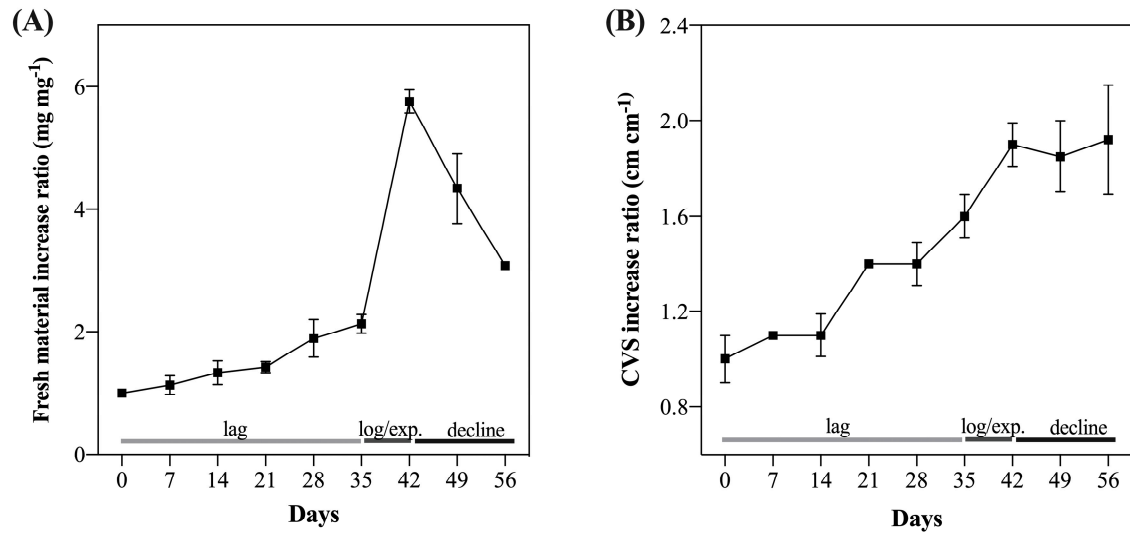

**Supplementary Figure S1** Increase ratio of growth dynamics of *G. chacoensis* embryogenic cultures measured by a destructive method **(A)** and non-destructive method **(B)**. **(A)** increase ratio based on fresh weight (mg mg<sup>-1</sup>); **(B)** increase ratio based on CVS (cm cm<sup>-1</sup>). Bars indicate the standard deviation of the mean. Lag: lag phase; log/exp: logarithmic or exponential phase; decline: decline phase.
